# Supplementary material for: A hexangular ring–core NiCo2O4 porous nanosheet/NiO nanoparticle composite as an advanced anode material for LIBs and catalyst for CO oxidation applications
Source: Royal Society of Chemistry journal article supplement (doi:10.1039/c5cc03801d), 2015-01-01
Supplement: c5cc03801d1.pdf [file c5cc03801d1.pdf]

## Electronic Supplementary Information (ESI) for **A hexangular ring-core NiCo<sub>2</sub>O<sub>4</sub> porous nanosheet/NiO nanoparticle composite as an advanced anode material for LIBs and catalyst for CO oxidation applications**

**Yanyan He, Liqiang Xu\*, Yanjun Zhai, Aihua Li and Xiaoxia Chen**

### **Experimental Section.**

#### **Material synthesis**

In a typical procedure, 0.01 mol Ni(CH<sub>3</sub>COO)<sub>2</sub>·4H<sub>2</sub>O and 0.01 mol Co (CH<sub>3</sub>COO)<sub>2</sub>·4H<sub>2</sub>O were dissolved in 20 ml distilled water, the mixture was stirred for 30 min and then 20 ml of NaOH (0.16 g) aqueous solution was added drop wise. Finally the solution was transferred to a Teflon-lined stainless-steel autoclave. After it was stirred vigorously for 1h, the autoclave was heated at 180 °C and maintained for 12 h. The resulting precipitates were collected by filtration, washed with distilled water and ethanol for three times, and dried at 60 °C. To obtain the final products, the as-prepared products were calcined in air at 300, 350, 400, 500 °C for 2 h with a heating rate of 1 °C/min, respectively.

#### **Structural characterization**

X-ray powder diffraction (XRD) patterns of the as-obtained products were achieved on a Bruker D8 advanced X-ray diffractometer (Cu<sub>kα</sub> radiation, λ=1.5418 Å). The morphologies and sizes of the samples were characterized by transmission electron microscopy (TEM) and scanning electron microscopy (SEM) measurements which were carried out using a JEM-2100 microscope, and a JSM-7600F field-emission microscope. The high resolution images and STEM images were observed on a high resolution transmission electron microscope (HRTEM, JEOL-2011) operating at 200 kV. The BET surface area (SBET) and Barrett-Joyner-Halenda (BJH) pore size distribution (PSD) were measured on a QuadraSorb SI surface area analyzer (version 5.06).

#### **Electrochemical measurements**

The electrochemical performances of the samples were tested in 2032-coin cells. The working electrodes consist of active materials (60 wt. %), carbon black (30 wt. %), and carboxymethyl cellulose III (CMC) (10 wt. %). Distilled water was used as the solvent. The mixed slurry was then spread onto a copper foil current collector and dried under vacuum at 60°C for 12 h, and then the copper foil was roll-pressed and cut into discs. The final loading density of the active materials was approximately 1-1.5 mg cm<sup>-2</sup>. Lithium discs with the diameter of 15 mm were used as the counter electrode. The electrolyte is the solution of 1M LiPF<sub>6</sub> dissolved in ethylene carbonate/dimethyl carbonate/diethyl carbonate (EC/DMC/DEC, 1:1:1 by volume). The cells were assembled in an argon-filled glove box. Galvanostatic discharge-charge cycling was performed on Land-CT2001A battery cyclers at 25 °C and cyclic voltammetry (CV) profile was measured at LK2005A Electrochemical Workstation in the range of 0.01–3V at a scanning rate of 0.1 mV s<sup>-1</sup>.

#### **CO Oxidation Catalysis**

In the catalytic experiments, the activity of the composite was measured using a continuous flow fixed bed micro-reactor, equipped by an electronically temperature programmed tube furnace at atmospheric pressure. The system was first purged with high purity N<sub>2</sub> gas (99.999 %), until the concentration of CO and CO<sub>2</sub> are about 0 ppm, and then a gas mixture of high-purity N<sub>2</sub>

(99.999 %, flow rate 32 ml/min), high-purity CO/N<sub>2</sub> mixed gas (10% CO in N<sub>2</sub>, 99.999 %, flow rate 4 ml/min) and high-purity O<sub>2</sub> (99.995 %, flow rate 4 ml/min) were introduced into the reactor which contained 50 mg crushed the composites. The concentrations of CO and CO<sub>2</sub> were analyzed by an online infrared gas analyzer (Gasboard-3121, China Wuhan Cubic Co.) and the resolution of the concentrations is 10 ppm.

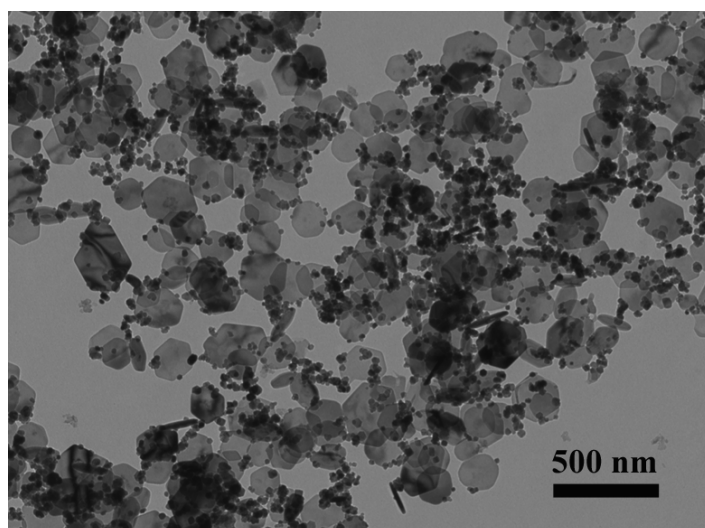

**Fig. S1** TEM image of the product obtained after the hydrothermal reaction.

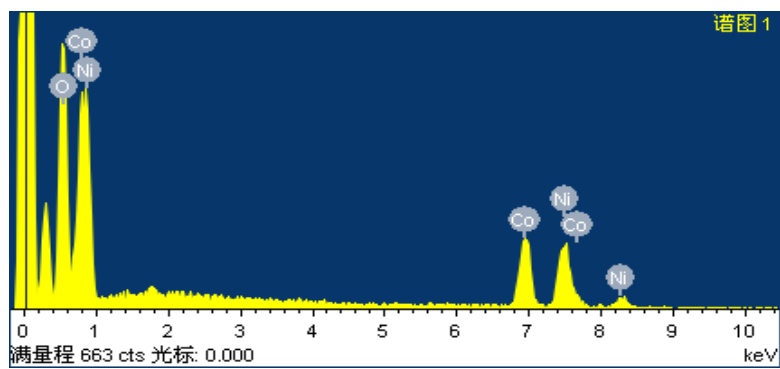

**Fig. S2** Energy Dispersive Spectrum (EDS) analysis of the composite.

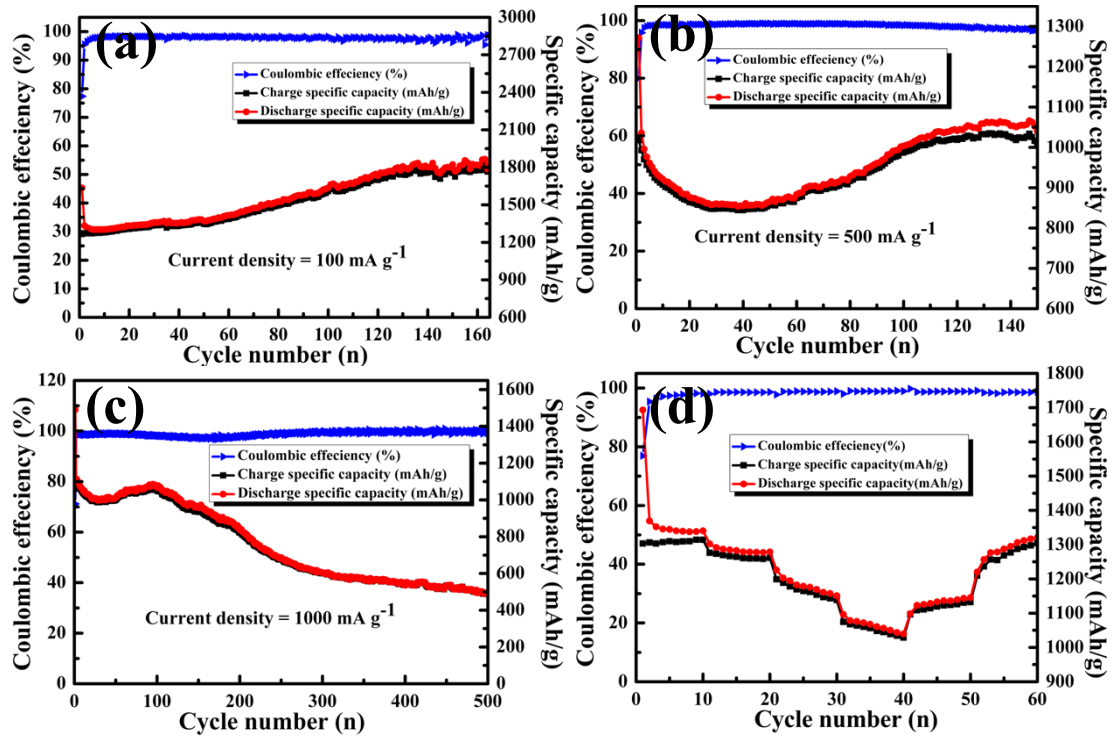

**Fig. S3** Cycling performance and coulombic efficiency of the product obtained after the hydrothermal reaction at a current density of 100 mA g<sup>-1</sup> (a), 500 mA g<sup>-1</sup> (b), 1000 mA g<sup>-1</sup> (c) and (d) Rate performance.

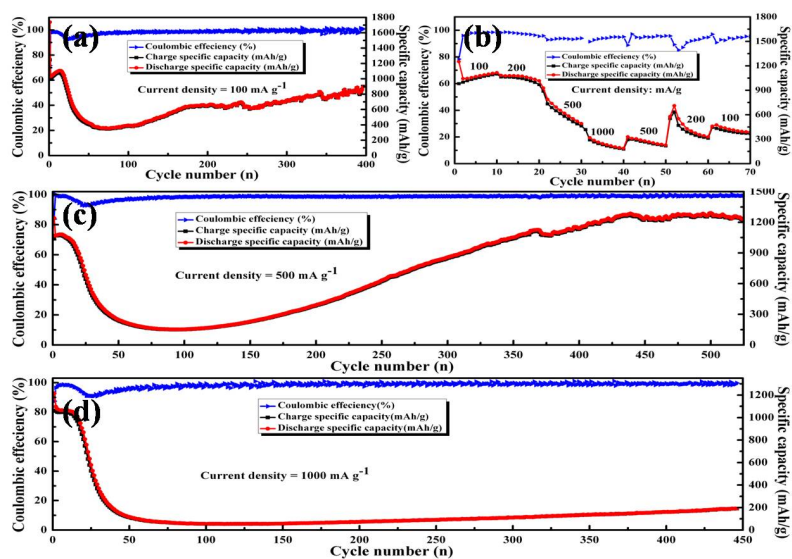

**Fig. S4** Cycling performance and coulombic efficiency of the  $\text{NiCo}_2\text{O}_4/\text{NiO}$  composite at a current density of  $100 \text{ mA g}^{-1}$  (a),  $500 \text{ mA g}^{-1}$  (c),  $1000 \text{ mA g}^{-1}$  (d) and (b) Rate performance.

In addition, the electrochemical performance of the working electrodes which consist of active material (70 wt%), carbon black (20 wt%), and carboxymethyl cellulose III (CMC) (10 wt%) are shown in Fig. S4 (ESI<sup>†</sup>), and a comparison between a carbon black content of 20 wt% and 30 wt% showed that carbon black could increase the stability of the material. The  $\text{NiCo}_2\text{O}_4/\text{Ni}(\text{OH})_2$  nanoparticle composite showed good electrochemical performance which is shown in Fig. S3 (ESI<sup>†</sup>).

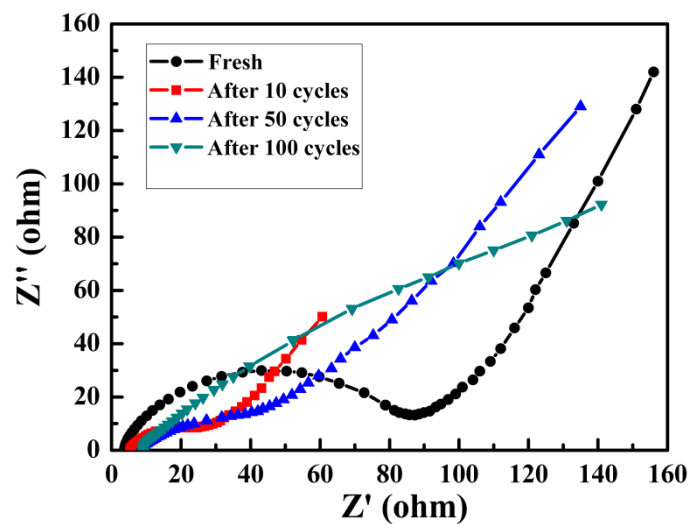

**Fig. S5** Electrochemical impedance spectra for the NiCo<sub>2</sub>O<sub>4</sub>/NiO composite cell before and after discharge–charge cycling for 10 cycles, 50 cycles, 100 cycles at the current density of 500 mA g<sup>-1</sup>.

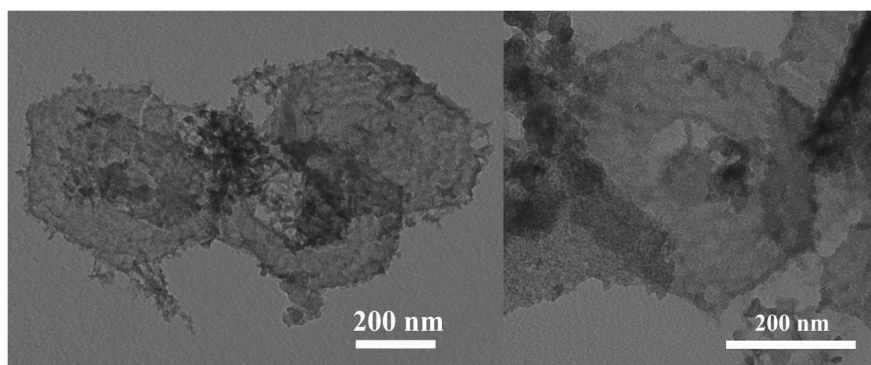

**Fig. S6** TEM images of the cycled composite (350 °C) at a current density of 100 mA g<sup>-1</sup> after 50 cycles.



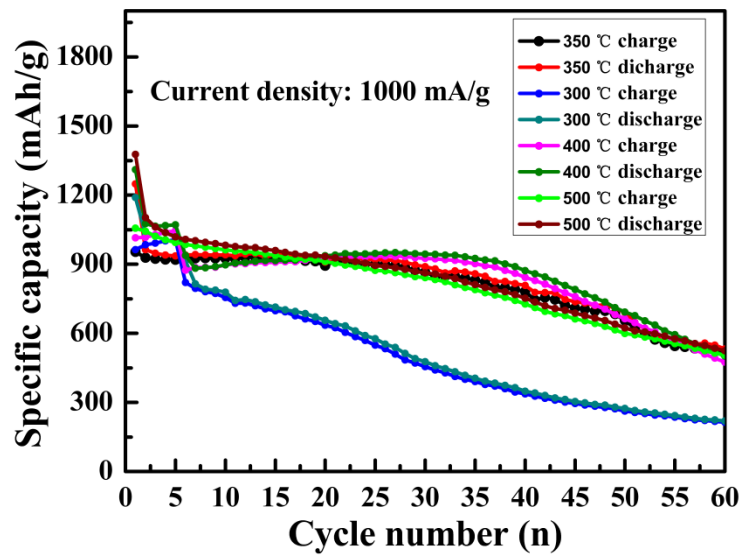

**Fig. S7** Cycling performances of the products obtained at different temperature (300 °C, 350 °C, 400 °C, 500 °C) at a current density of 1000 mA g<sup>-1</sup>.

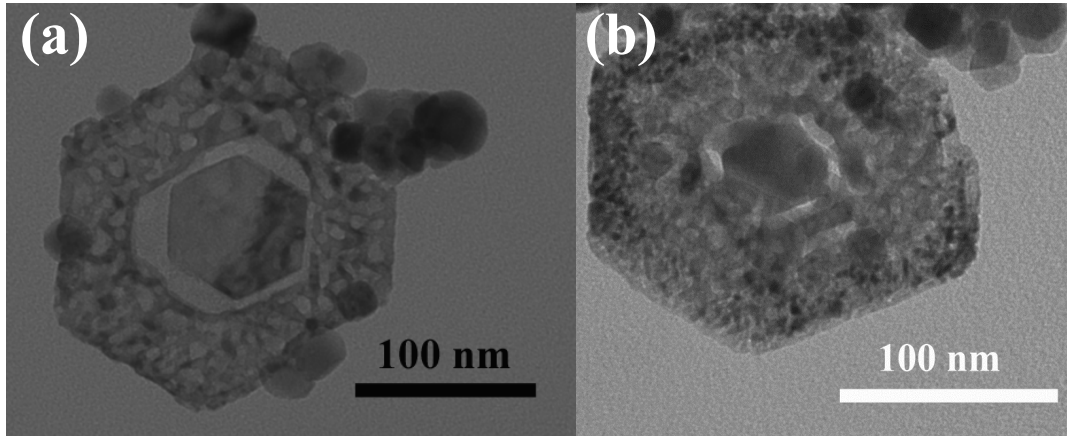

**Fig. S8** Randomly selected TEM images of one unit of the composite from the whole (350 °C) (a) before CO oxidation reaction and (b) after CO oxidation reaction.

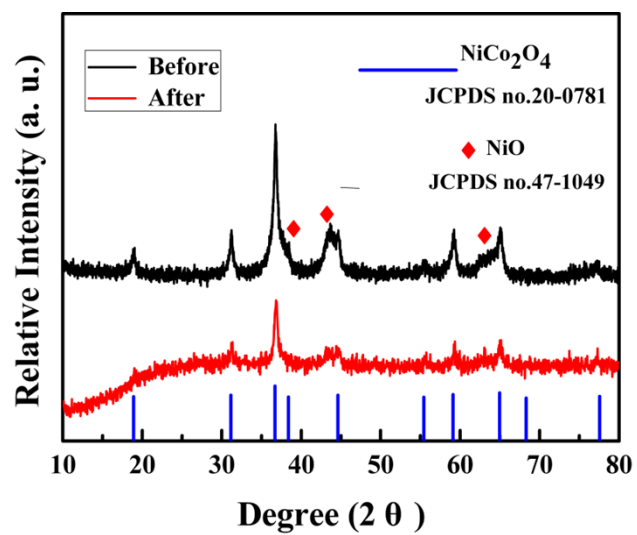

**Fig. S9** XRD patterns of the composite (350 °C) before CO oxidation reaction and after CO oxidation reaction.

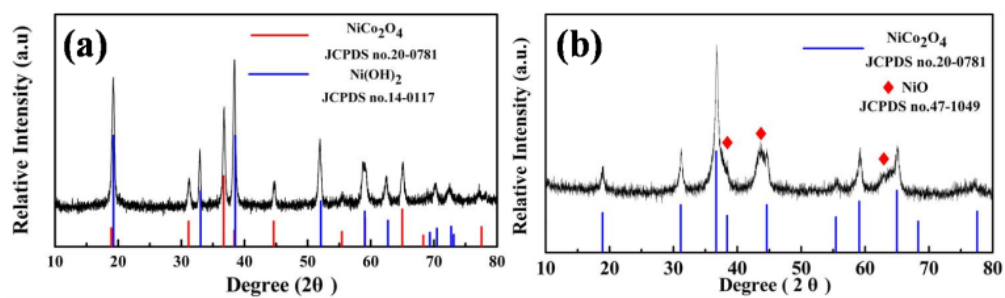

**Fig. S10** XRD patterns of (a) the product obtained after the hydrothermal reaction; (b) the products after the calcinations (350 °C).

Fig. S10 (a) shows the XRD pattern of the product obtained after the hydrothermal reaction and all the diffraction peaks could be indexed to hexagonal Ni(OH)<sub>2</sub> (JCPDS card no.14-0117) and cubic NiCo<sub>2</sub>O<sub>4</sub> (JCPDS card no.20-0781). As shown in Fig. S10 (b), the cubic NiCo<sub>2</sub>O<sub>4</sub> (JCPDS card no.20-0781) and cubic NiO (JCPDS card no.47-1049) are co-existed in the products after the calcinations process of 350 °C.

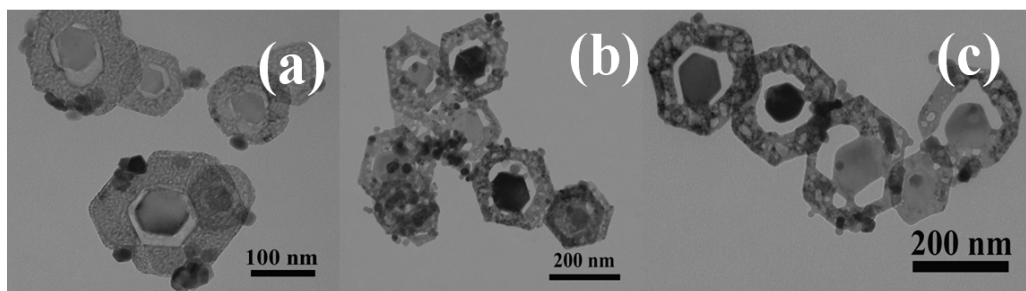

**Fig. S11** TEM images of the composite obtained at different calcination temperatures: (a) 300 °C, (b) 400 °C, (c) 500 °C.

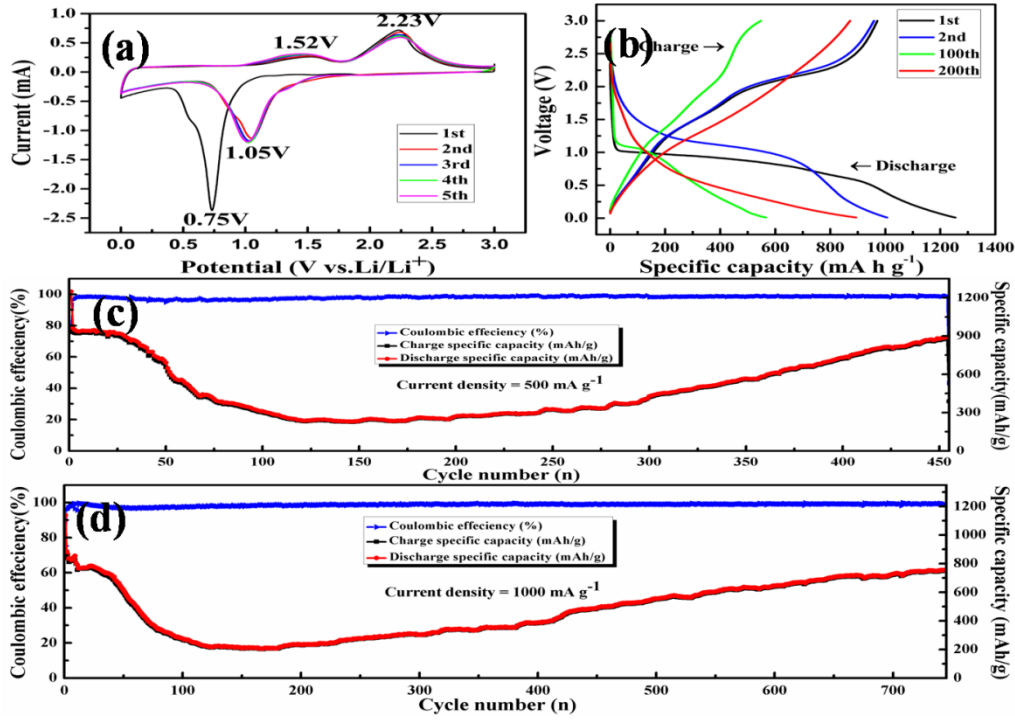

**Fig. S12** The CV curves (a); the charge–discharge curves at 200 mA g<sup>-1</sup> (b); cycling performance and coulombic efficiency at 500 mA g<sup>-1</sup> (c) and 1000 mA g<sup>-1</sup> (d) of the composite (350 °C).

Fig. S12 (a) shows the cyclic voltammograms of the NiCo<sub>2</sub>O<sub>4</sub>/NiO composite for the 1st, 2nd, 3rd, 4th and 5th cycles at a scan rate of 0.1 mV s<sup>-1</sup> in the voltage window of 0.01–3 V Li/Li<sup>+</sup>. During the first reduction scan, an intense reduction peak around 0.75 V was observed, which may be assigned to the reduction of NiCo<sub>2</sub>O<sub>4</sub> to metallic Ni and Co (eqn (1)). Meanwhile, the two oxidation peaks at around 1.5 V and 2.2 V correspond to the oxidation of Ni<sup>0</sup> to Ni<sup>2+</sup> (eqn (2)) and Co to Co<sup>3+</sup> (eqn (3) and (4)). During the subsequent cycles, the reduction peak shifted to around 1.05 V and the oxidation peaks changed inconspicuously. The CV curves were similar after the first cycle, which suggested that the performance of the electrode is stable. The lithium intercalation and extraction in the reactions might be attributed to the process as follows:<sup>20, 21</sup>

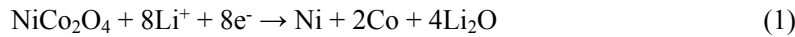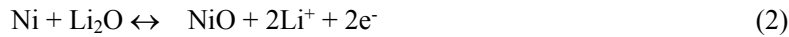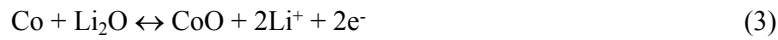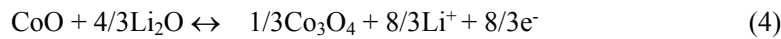

**Table S1** Comparisons between the hexangular ring-core NiCo<sub>2</sub>O<sub>4</sub> porous nanosheet/NiO nanoparticle composite and previously reported NiCo<sub>2</sub>O<sub>4</sub> and related nanocomposite.

| Electrode materials                                                                                          | Reversible capacity (mA h g <sup>-1</sup> ) | Current density (mA g <sup>-1</sup> ) | Cycle number (n)        | Ref. |
|--------------------------------------------------------------------------------------------------------------|---------------------------------------------|---------------------------------------|-------------------------|------|
| NiCo <sub>2</sub> O <sub>4</sub> porous nanoplates/RGO                                                       | 816                                         | 100                                   | 70                      | 1    |
| Fe <sub>2</sub> O <sub>3</sub> @NiCo <sub>2</sub> O <sub>4</sub> porous nanocages                            | 1079.6                                      | 100                                   | 100                     | 2    |
| NiCo <sub>2</sub> O <sub>4</sub> nanotubes decorated by Au nanoparticles                                     | 732.5                                       | 100                                   | 200                     | 3    |
| NiCo <sub>2</sub> O <sub>4</sub> /C nanocomposite                                                            | 751.8                                       | 40                                    | 50                      | 4    |
| Carbon-Coated NiCo <sub>2</sub> O <sub>4</sub> @SnO <sub>2</sub>                                             | 765                                         | 100                                   | 50                      | 5    |
| Mesoporous spinel NiCo <sub>2</sub> O <sub>4</sub>                                                           | 1000                                        | 442                                   | 400                     | 6    |
| NiCo <sub>2</sub> O <sub>4</sub> mesoporous microspheres                                                     | 1198<br>705                                 | 200<br>800                            | 30<br>500               | 7    |
| NiCo <sub>2</sub> O <sub>4</sub> nanoflakes                                                                  | 884<br>981                                  | 500<br>500                            | 100<br>100              | 8    |
| NiCo <sub>2</sub> O <sub>4</sub> nanobelts                                                                   |                                             |                                       |                         |      |
| NiCo <sub>2</sub> O <sub>4</sub> hollow nanospheres                                                          | 695                                         | 200                                   | 200                     | 9    |
| NiCo <sub>2</sub> O <sub>4</sub> hollow nanocubes                                                            | 1160                                        | 200                                   | 200                     | 10   |
| NiCo <sub>2</sub> O <sub>4</sub> microflowers                                                                | 720                                         | 500                                   | 100                     | 11   |
| Our work (hexangular ring-core NiCo <sub>2</sub> O <sub>4</sub> porous nanosheet/NiO nanoparticle composite) | 1567.3<br>894<br>893<br>753                 | 100<br>200<br>500<br>100              | 50<br>200<br>455<br>740 |      |

**Table S2** Comparisons between the hexangular ring-core NiCo<sub>2</sub>O<sub>4</sub> porous nanosheet/NiO nanoparticle composite and previously reported anode materials.

| Electrode materials                                                                                          | Reversible capacity (mA h g <sup>-1</sup> ) | Current density (mA g <sup>-1</sup> ) | Cycle number (n) | Ref. |
|--------------------------------------------------------------------------------------------------------------|---------------------------------------------|---------------------------------------|------------------|------|
| Graphite                                                                                                     | 360                                         | 53.1                                  | 150              | 12   |
| Porous carbon sphere                                                                                         | 365                                         | 37.2                                  | 100              | 13   |
|                                                                                                              | 250                                         | 372                                   | 100              |      |
| N-doped graphene /graphite                                                                                   | 344.5                                       | 3720                                  | 1000             | 14   |
| Si/C composite                                                                                               | 600                                         | 100                                   | 100              | 15   |
| Mesoporous Si nanorod                                                                                        | 1038                                        | 200                                   | 170              | 16   |
| TiO <sub>2</sub> nanowires                                                                                   | 292                                         | 50                                    | 1000             | 17   |
|                                                                                                              | 189.8                                       | 50                                    | 2000             |      |
| Nano-Li <sub>4</sub> Ti <sub>5</sub> O <sub>12</sub> /carbon nanotubes                                       | ~150                                        | 106.5                                 | 100              | 18   |
| Hierarchical titanate microspheres                                                                           | ~230                                        | 50                                    | 100              | 19   |
| Our work (hexangular ring-core NiCo <sub>2</sub> O <sub>4</sub> porous nanosheet/NiO nanoparticle composite) | 1567.3                                      | 100                                   | 50               |      |
|                                                                                                              | 894                                         | 200                                   | 200              |      |
|                                                                                                              | 893                                         | 500                                   | 455              |      |
|                                                                                                              | 753                                         | 100                                   | 740              |      |



**Table S3** Inductively coupled plasma atomic emission spectrometry (ICP-AES) analysis of the composite.

| Elem    | Avg   | Units | Stddev | %RSD   |
|---------|-------|-------|--------|--------|
| Co 2286 | 4.145 | ppm   | .000   | .0014  |
| Ni 2316 | 4.124 | ppm   | .001   | .0.282 |

In the composite,  $\text{NiCo}_2\text{O}_4$  belongs to cubic system and isostructural to  $\text{Co}_3\text{O}_4$  with spinel structure, According to the previous reports,<sup>22, 23</sup>  $\text{Co}^{3+}$  is the active site of the CO oxidation, the large amount of  $\text{Co}^{3+}$  cations provide sufficient sites for CO adsorption, which occurs easily. The reaction between the adsorbed CO and the nearby active oxygen species to form  $\text{CO}_2$  might be the rate-determining step. Similarly, the NiO belongs to cubic system,  $\text{Ni}^{2+}$  is the active site of the CO oxide according to the previous report,<sup>24</sup> and the CO adsorbed to Ni-O reacting with the active oxygen species form  $\text{CO}_2$ .

## References:

- 1 Y. J. Chen, M. Zhuo, J. W. Deng, Z. Xu, Q. H. Li and T. H. Wang, *J. Mater. Chem. A*, 2014, **2**, 4449.
- 2 G. Huang, L. L. Zhang, F. F. Zhang and L. M. Wang, *Nanoscale*, 2014, **6**, 5509.
- 3 J. Zhu, Z. Xu and B. A. Lu, *Nano Energy*, 2014, **7**, 114.
- 4 Y. N. NuLi, P. Zhang, Z. P. Guo, H. K. Liu and J. Yang, *Electrochem. Solid-State Lett.*, 2008, **11**, A64.
- 5 G. X. Gao, H. B. Wu, S. J. Ding and X. L. Wang, *Small*, 2014, **4**, 432.
- 6 H. S. Jadhav, R. S. Kalubarme, C. N. Park, J. Kim and C. J. Park, *Nanoscale*, 2014, **6**, 10071.
- 7 J. F. Li, S. L. Xiong, Y. R. Liu, Z. C. Ju and Y. T. Qian, *ACS Appl. Mat. Interfaces*, 2013, **5**, 981.
- 8 A. K. Mondal, D. W. Su, S. Q. Chen, X. Q. Xie, and G. X. Wang, *ACS Appl. Mat. Interfaces*, 2014, **6**, 14827.
- 9 X. Y. Yao, C. Y. Zhao, J. H. Kong, D. Zhou and X. H. Lu, *RSC Adv.*, 2014, **4**, 37928.
- 10 H. Guo, L.X. Liu, T. T. Li, W. W. Chen, J. J. Liu, Y. Y. Guo and Y. C. Guo, *Nanoscale*, 2014, **6**, 5491.
- 11 J. M. Xu, L. He, W. Xu, H. B. Tang, H. Liu, T. Han, C. J. Zhang and Y. H. Zhang, *Electrochim. Acta*, 2014, **145**, 185.
- 12 H. Buqa, D. Goers, M. Holzapfel, M. E. Spahr and P. Novak, *J. Electrochem. Soc.*, 2005, **152**, A474.
- 13 V. Etacheri, C. W. Wang, M. J. O'Connell, C. K. Chan and V. G. Polet, *J. Mater. Chem. A*, 2015, **3**, 9861.
- 14 G. H. Wu, R. Y. Li, Z. J. Li, Z. G. Gu and G. L. Wang, *Electrochim. Acta*, 2015, **171**, 156.
- 15 M. Li, X. H. Hou, Y. J. Sha, J. Wang, S. J. Hu, X. Liu and Z. P. Shao, *J. Power Sources*, 2014, **248**, 721.
- 16 Y. L. Zhou, X. L. Jiang, L. Chen, J. Yue, J. Yang and Y. T. Qian, *Electrochim. Acta*, 2014, **127**, 252.
- 17 F. X. Wu, Z. X. Wang, X. H. Li and H. G. Guo, *J. Mater. Chem.*, 2011, **21**, 12675.
- 18 H. F. Ni and L. Z. Fan, *J. Power Sources*, 2012, **214**, 195.
- 19 J. M. Li, W. Wan, F. Zhu, Q. Li, H. H. Zhou, J. J. Li and D. S. Xu, *Chem. Commun.*, 2012, **48**, 389.
- 20 Y. J. Zhai, H. Z. Mao, P. Liu, X. C. Ren, L. Q. Xu and Y. T. Qian, *J. Mater. Chem. A*, 2015, **3**, 16142.
- 21 H. S. Jadhav, R. S. Kalubarme, C. N. Park, J. Kim and C. J. Park, *Nanoscale*, 2014, **6**, 10071.
- 22 J. Jansson, *J. Catal.*, 2000, **194**, 55.
- 23 X. Xie, Y. Li, Z. Q. Liu, H. Masatake and W. J. Shen, *Nature*, 2009, **458**, 746.
- 24 C. J. Tang, J. C. Li, X. J. Yao, J. F. Sun, Y. Cao, L. Zhang, F. Gao, Y. Deng and L. Dong, *Appl. Catal., A*, 2015, **494**, 77.
